# Supplementary material for: Exosomes derived from alcohol-treated hepatocytes horizontally transfer liver specific miRNA-122 and sensitize monocytes to LPS
Source: PubMed Central journal article supplement (PMC4650752; doi:10.1038/srep09991), 2015-05-14
Supplement: srep09991-s1.pdf [file srep09991-s1.pdf]

## Supplementary Figure

**Title: Exosomes derived from alcohol-treated hepatocytes horizontally transfer liver specific miRNA-122 and sensitize monocytes to LPS**

**Authors:** Fatemeh Momen-Heravi\*, Shashi Bala\*, Karen Kodys, Gyongyi Szabo

\*These authors contributed equally to this work.

<sup>1</sup>Department of Medicine, University of Massachusetts Medical School, Worcester, MA 01605, USA.

**Corresponding Author:** Gyongyi Szabo, MD PhD

# Supplementary Figure 1

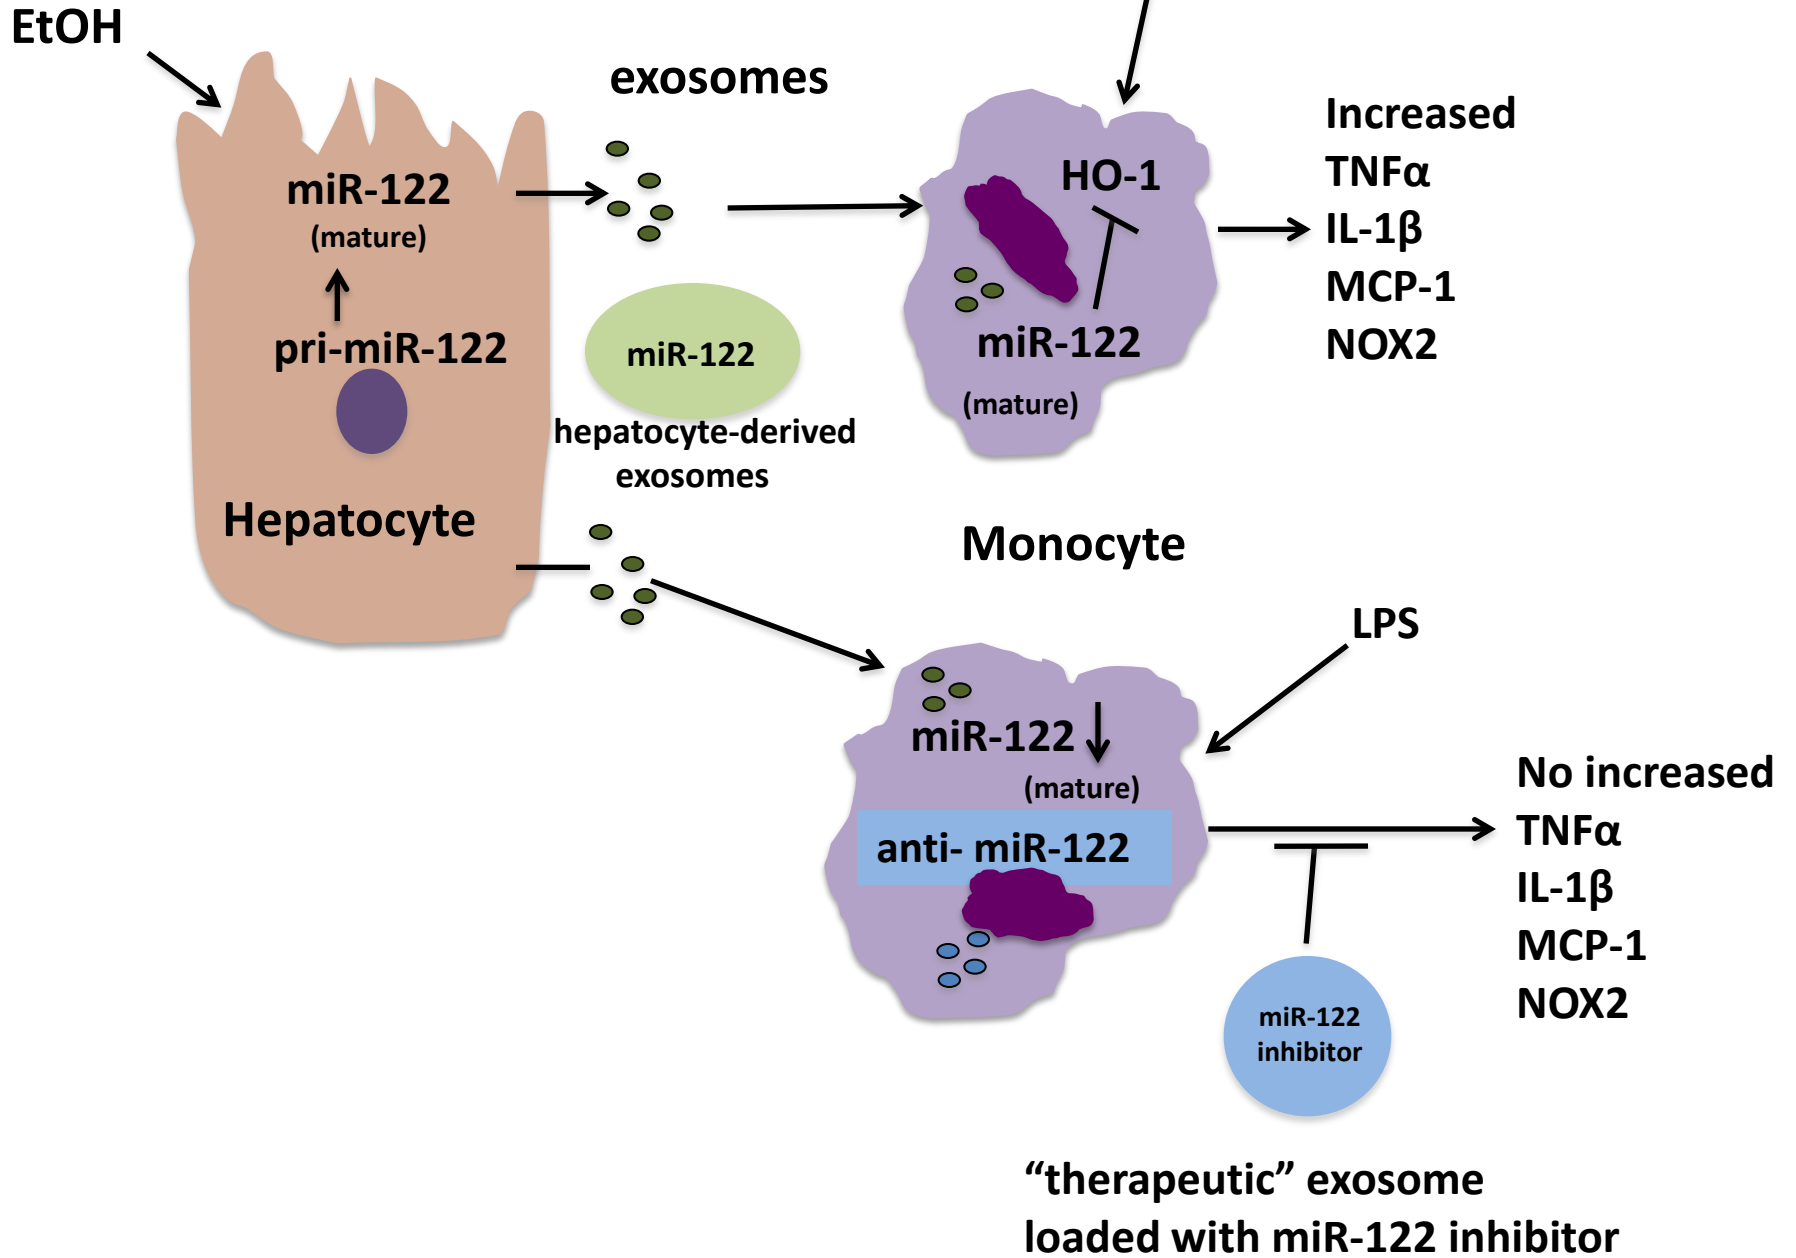

**Supplementary Figure 1-** This schematic depicts the experimental design and activated pathway after treatment of THP1 human monocytes with exosomes derived from ethanol-treated Huh7.5 cells.
